# Supplementary material
Source: MDPI journal article supplement (https://www.mdpi.com/2073-4441/13/20/2854)
Supplement: s1 [file s1]

Supporting information for

## **Comparison of different procedures for separating microplastics from sediments**

*Veronica Nava\**, *Barbara Leoni*

Department of Earth and Environmental Sciences, University of Milano-Bicocca, Piazza Della Scienza 1, I-20126 Milano, Italy.

\*Corresponding author: Veronica NAVA, +390264482705, [v.nava15@campus.unimib.it](mailto:v.nava15@campus.unimib.it)

### **Contents of this file**

Figures S1 to S2

### **Introduction**

The supporting information contains 3 figures as supplements to the content of the paper.

The figures display example pictures of the microplastics added to the samples for the recovery test (Fig. S1), example pictures of the filters obtained at the end of the application of the three different protocol tested (Fig. S2), and Raman spectra of the two polymers used (Fig. S3).

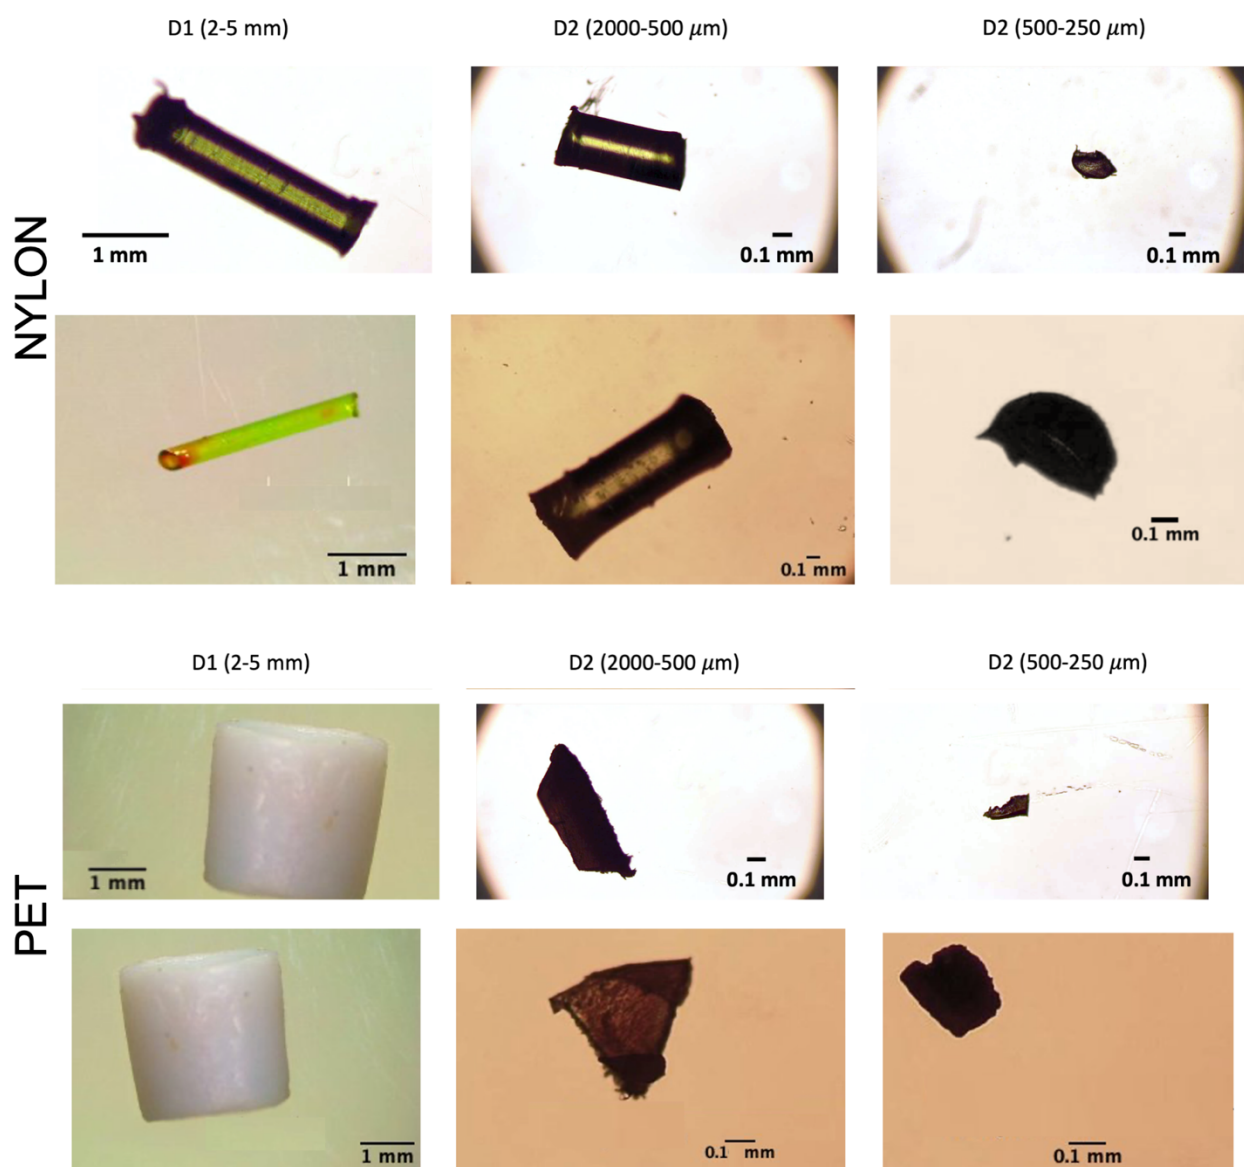

**Figure S1.** Example of the pictures taken to each plastic fragment for nylon and polyethylene terephthalate (PET) for the different dimensional classes (D1, D2, D3).

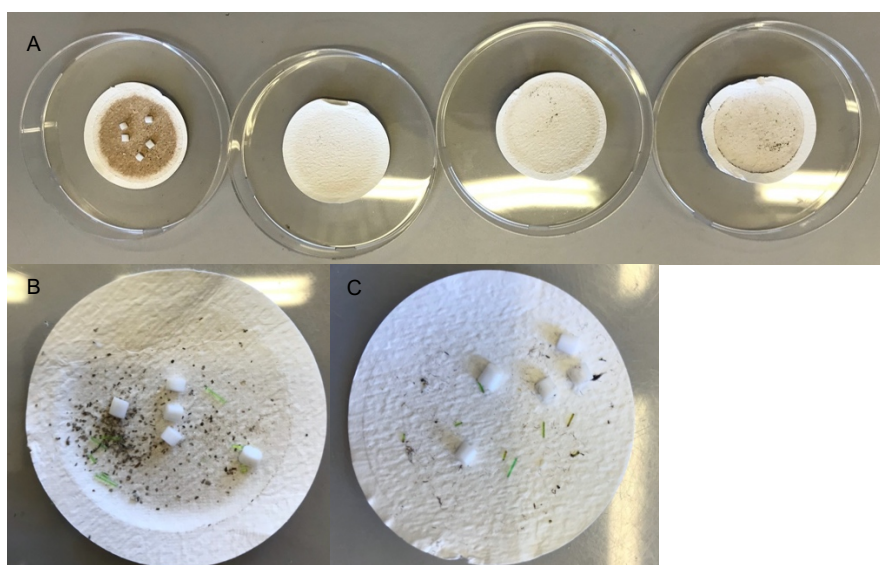

**Figure S2.** Example of the filters obtained for (A) protocol 1; (B) protocol 2; (C) protocol 3.

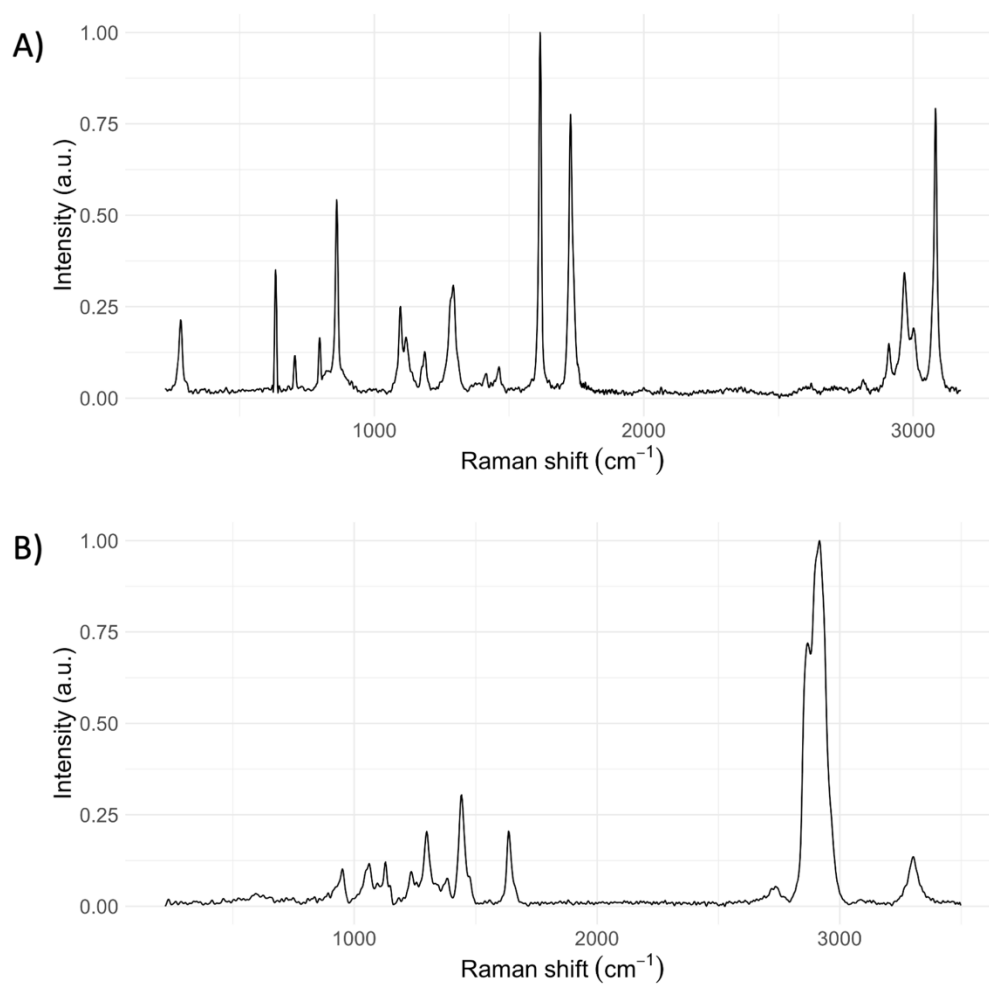

**Figure S3.** Raman spectra of the plastic particles used: (A) polyethylene terephthalate; (B) nylon.
